# Supplementary material
Source: PubMed Central journal article supplement (PMC2910278)

# Supplementary Figure 1

**A**

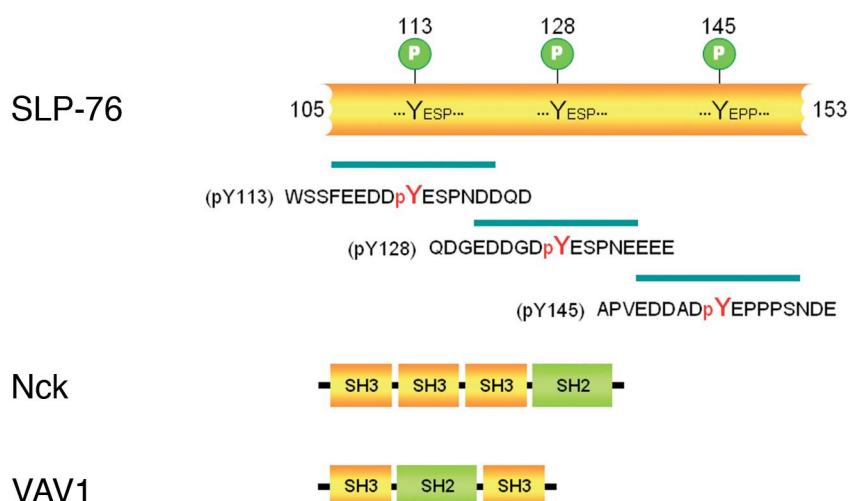

**B**

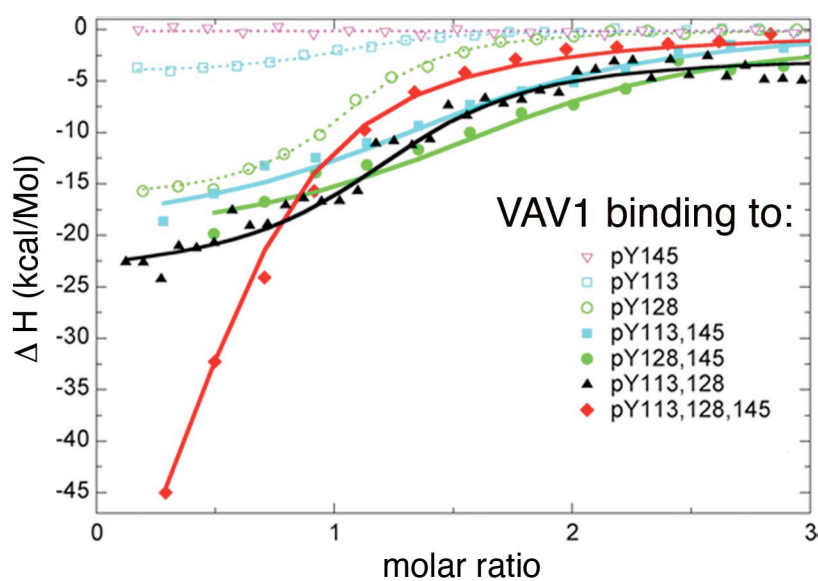

**C**

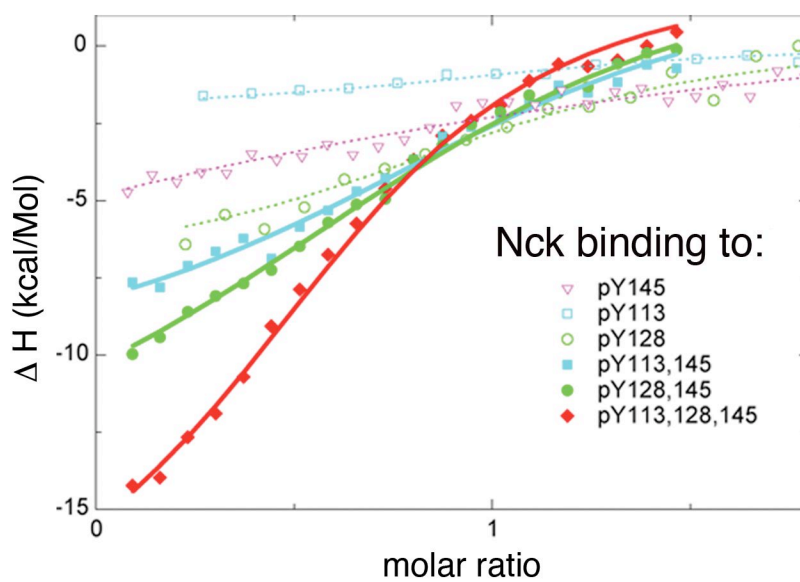

## Supplementary Figure 2

**A**

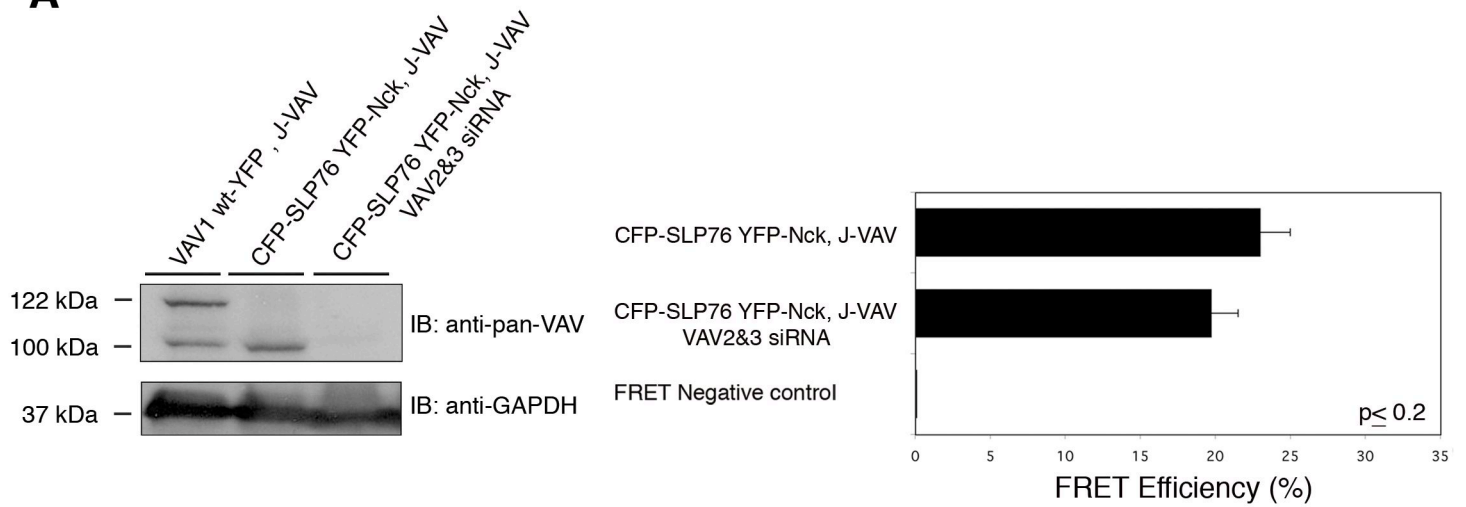

**B**

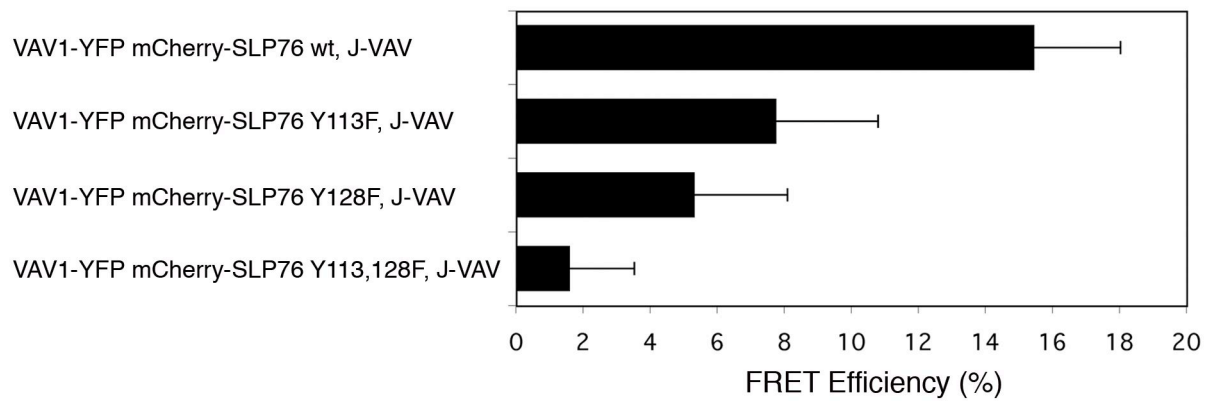

**C**

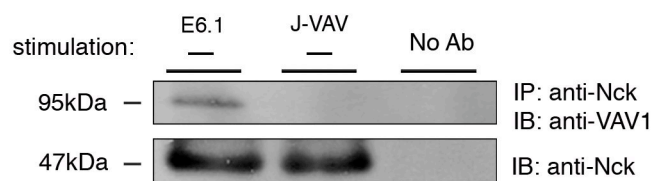

**D**

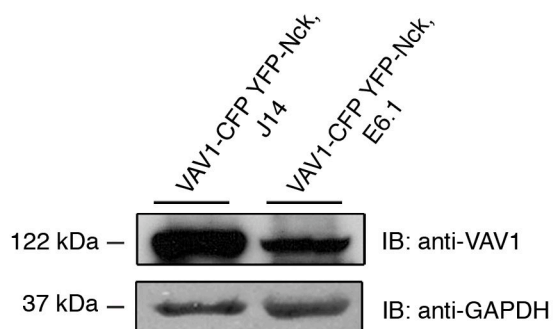

## Supplementary Figure 3

```
Grb2_SH3-C(159-217)  TYVQALFDEDPQEDGELGFRRGDFIHVMDN--SDPNWWKG--ACHGQTGMFPRNYVTPVNRNV
Nck_SH3-C(193-251)  HVVQALYPFSSSNDEELNFEKGDVMDVIEKPENDPEWWKCR-KINGMVGLVPKNYVTVMQ---
Nck_SH3-M(109-164)  MPAYVKFNMAEREDELSLIKGTKVIVMEK--CSDGWWRG--SYNGQVGWFPSPNYVTEEG---
Nck_SH3-N(5-60)     VVVVAKFDYVAQQEQELDIKKNERLWLLD---DSKSWWRVRNSMNST-GFVPSNYVERKN---
```

# Supplementary Figure 4

**A**

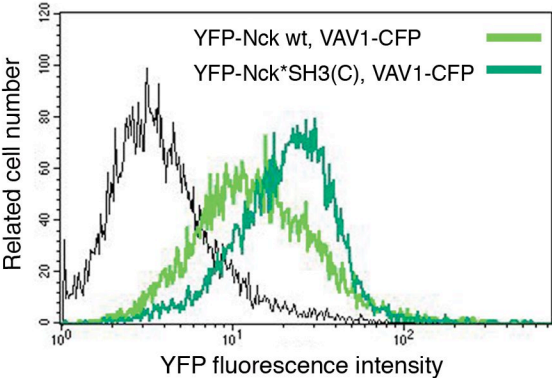

**B**

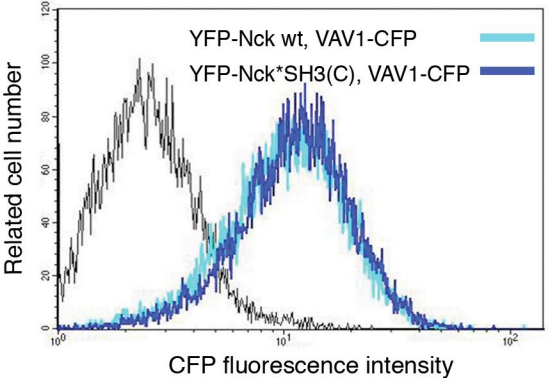

**C**

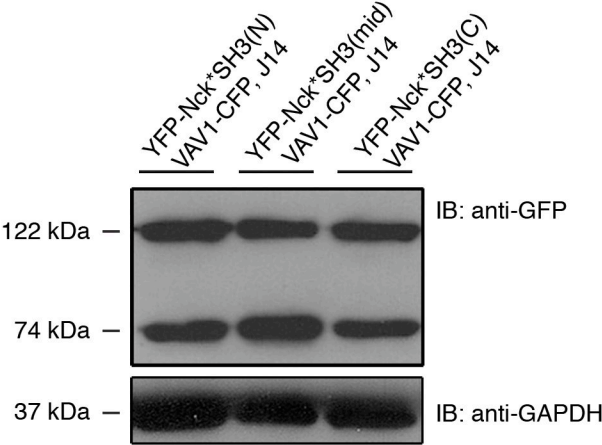

**D**

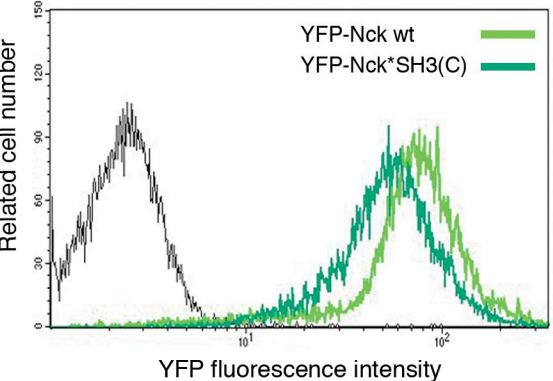

**E**

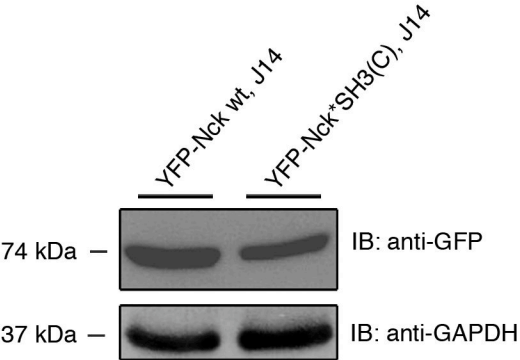

**F**

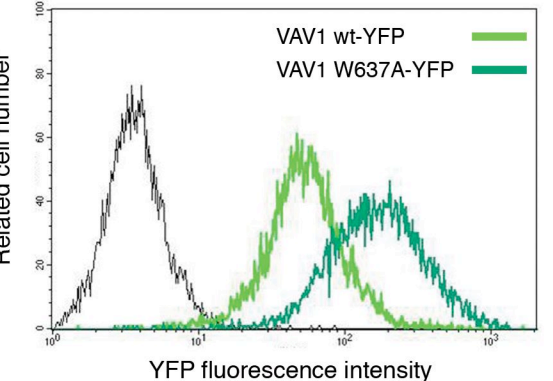

# Supplementary Figure 5

**A**

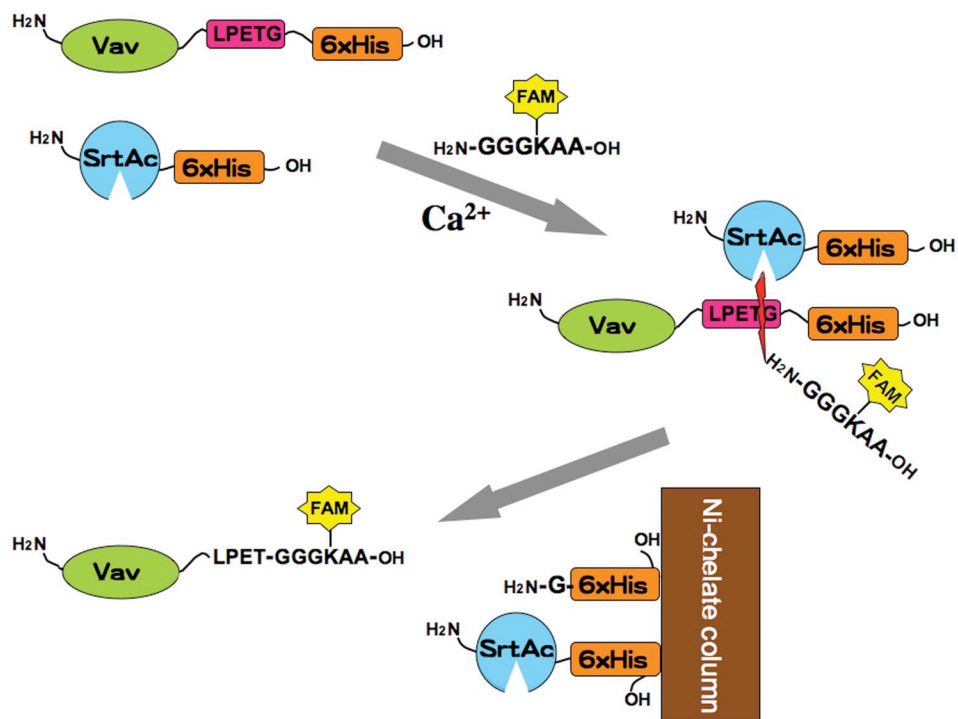

**B**

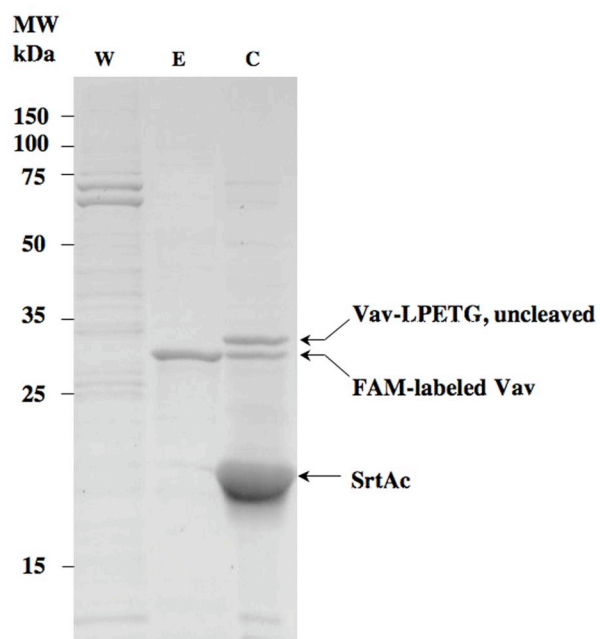

Supplement: emboj2010133s1.pdf [file emboj2010133s1.pdf]
